# Supplementary material for: Fe(iii) doped NiS2 nanosheet: a highly efficient and low-cost hydrogen evolution catalyst
Source: Royal Society of Chemistry journal article supplement (doi:10.1039/c6ta11041j), 2017-01-01
Supplement: c6ta11041j1.pdf [file c6ta11041j1.pdf]

## ***Supporting information***

### **Fe (III) doped NiS<sub>2</sub> nanosheet: A highly efficient and low-cost hydrogen evolution catalyst**

Junqing Yan<sup>a,\*</sup>, Huan Wu<sup>a,1</sup>, Ping Li<sup>a,1</sup>, Hui Bian<sup>a</sup>, Hong Chen<sup>a</sup>, Ruibin Jiang<sup>a</sup> and Shengzhong (Frank) Liu<sup>a,b\*</sup>

*<sup>a</sup> Key Laboratory of Applied Surface and Colloid Chemistry, National Ministry of Education; Shaanxi Engineering Lab for Advanced Energy Technology, School of Materials Science and Engineering, Shaanxi Normal University, Xi'an, 710119, People's Republic of China.*

*1: These authors contributed equally to this work.*

*E-mail: [junqingyan@snnu.edu.cn](mailto:junqingyan@snnu.edu.cn), [liusz@snnu.edu.cn](mailto:liusz@snnu.edu.cn)*

*<sup>b</sup> iChEM, Dalian Institute of Chemical Physics, Dalian National Laboratory for Clean Energy, Chinese Academy of Sciences, Dalian, 116023, P. R. China*

### ***DFT calculations***

DFT calculations were performed with program package DMol in Materials Studio of Accelrys Inc. The exchange-correlation energy was treated by the Perdew-Burke-Ernzerhof (PBE) functional based on the generalized gradient approximation (GGA) [1]. In order to consider dispersion force, a semiempirical DFT-D2 method proposed by Grimme was exploited. [2] The NiS<sub>2</sub> (002) was cleaved from the optimized bulk Pd and PdZn alloy. The surface was modeled using a (1 × 1) surface unit cell with eight atomic layers, separated by 10 Å of vacuum. The Fe-doped NiS<sub>2</sub> (002) was constructed by replacing one Ni atom on surface with Fe atom. The reciprocal space was sampled with a (5 × 5 × 1) k-points grid generated automatically using the Monkhorst–Pack method. [3] Full-geometry optimization was performed for all relevant adsorbates and the uppermost three layers without symmetry restriction, while the bottom layer metal atoms were fixed at the bulk-truncated positions at the calculated lattice constants. Transition state (TS) searches were performed with the complete LST/QST method implemented in DMol. [4]

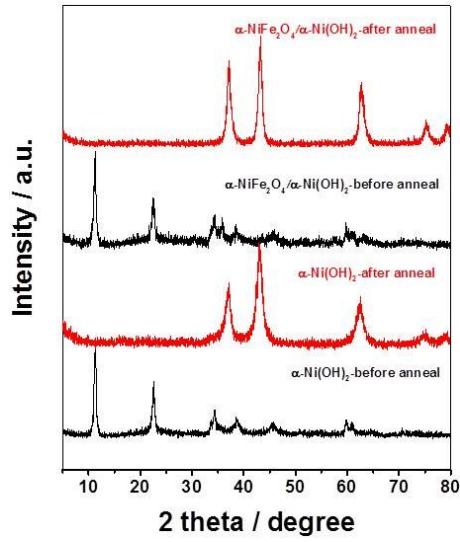

**Figure S1.** XRD patterns of the used precursor and the results after 400deg anneal under  $\text{N}_2$  atmosphere without sulfur powder.

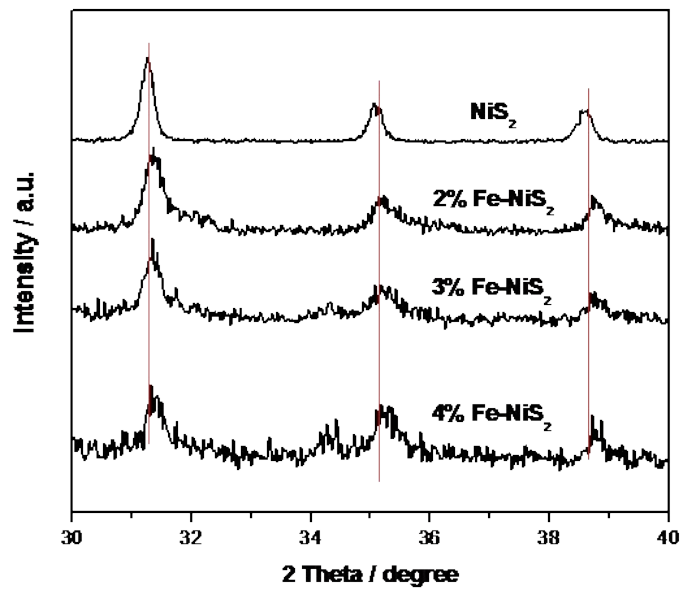

**Figure S2.** The magnified XRD patterns of the Fe doped and bare  $\text{NiS}_2$  at 2 theta from 30 to 40 degree.

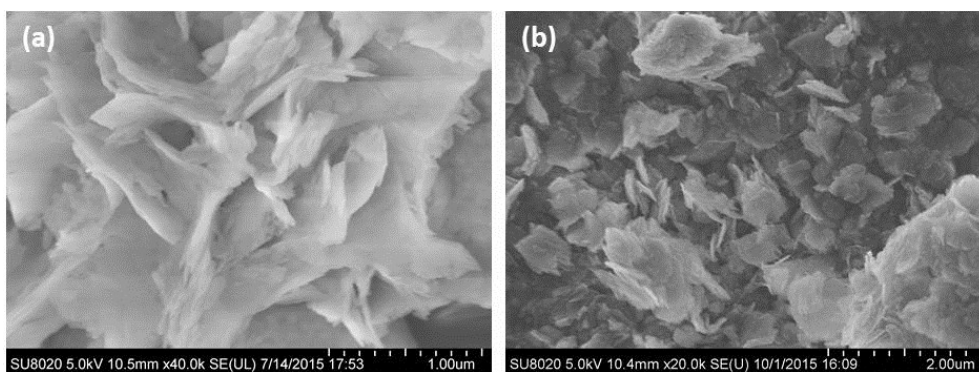

**Figure S3.** SEM images of the used precursor (a) Ni(OH)<sub>2</sub>, (b) NiFe<sub>2</sub>O<sub>4</sub>/Ni(OH)<sub>2</sub>.

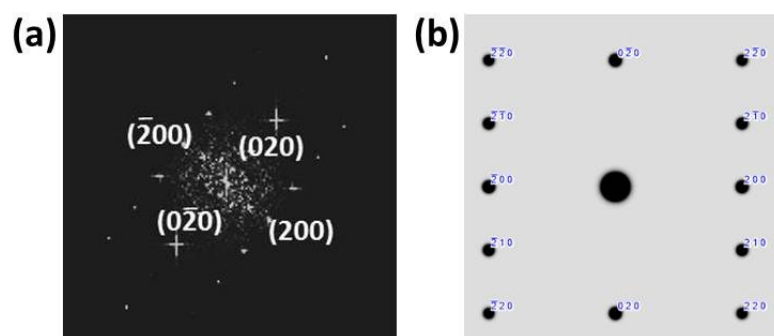

**Figure S4.** (a) FFT result of the HRTEM of NiS<sub>2</sub> in Figure 2 (g); (b) the simulated FFT result with the (020) facet.

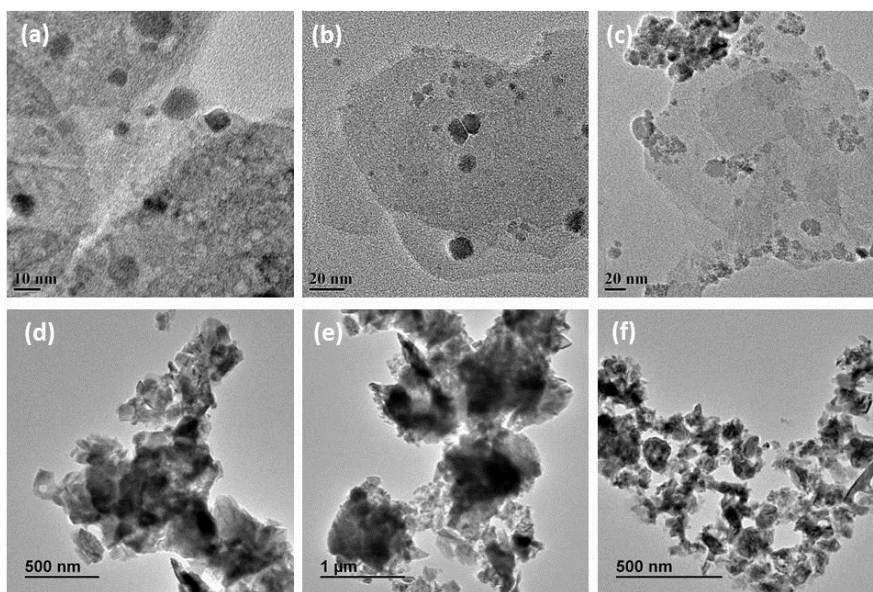

**Figure S5.** (a) and (d) TEM image before and after sulfurization of sample (1), which was synthesized from 4% Fe; (b) and (e) TEM image before and after sulfurization of sample (2), which was synthesized from 3% Fe; the sulfur is 50 mg; (c) and (f) TEM image before and after sulfurization of sample (2); which was synthesized from 3% Fe.

**Table S1** The full width at half maximum (FWHM) of Ni 2p XPS of NiS<sub>2</sub> and Fe-NiS<sub>2</sub>.

| Sample              | Position / eV | FWHM / eV | Position / eV | FWHM / eV |
|---------------------|---------------|-----------|---------------|-----------|
| NiS <sub>2</sub>    | 852.9         | 1.7       | 870.4         | 2.3       |
| Fe-NiS <sub>2</sub> | 852.9         | 2.5       | 870.4         | 2.8       |

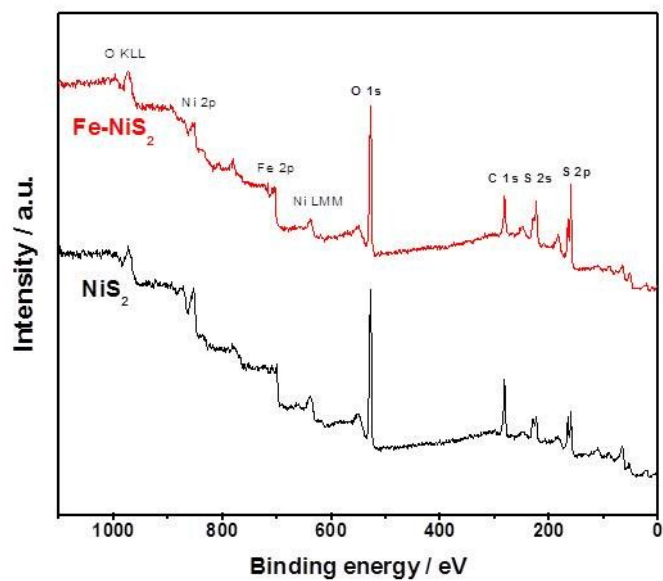

**Figure S6.** The wide XPS spectra of NiS<sub>2</sub> and Fe-NiS<sub>2</sub> sample.

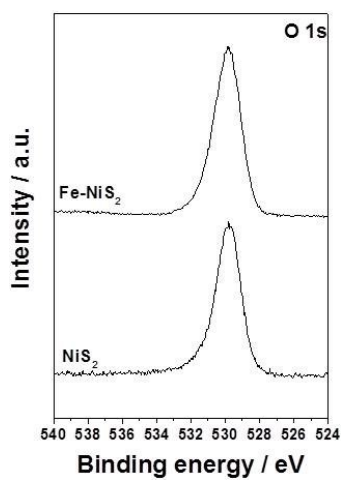

**Figure S7.** The O 1s XPS spectra of NiS<sub>2</sub> and Fe-NiS<sub>2</sub> sample.

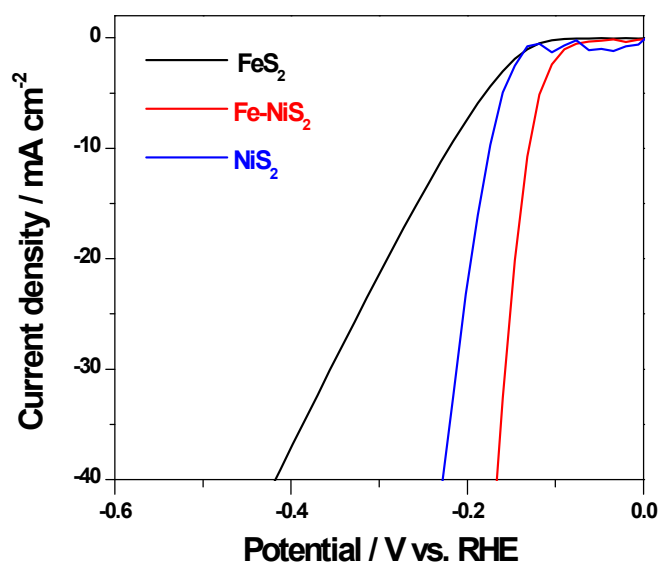

**Figure S8.** The HER performance of FeS<sub>2</sub>, NiS<sub>2</sub> and Fe-NiS<sub>2</sub>. 0.5 M H<sub>2</sub>SO<sub>4</sub> was used as the electrolyte, the scan rate was 2mv/s.

**Table S2** The relative content of Fe element obtained from XPS, EDS and ICP methods. Fe/Ni (mole ratio) / %

| Sample                 | XPS  | TEM-EDS | ICP  |
|------------------------|------|---------|------|
| 1% Fe-NiS <sub>2</sub> | 0.98 | 0.99    | 0.99 |
| 2% Fe-NiS <sub>2</sub> | 2.02 | 2.02    | 1.99 |
| 3% Fe-NiS <sub>2</sub> | 2.98 | 2.99    | 3.02 |
| 4% Fe-NiS <sub>2</sub> | 3.97 | 4.02    | 3.99 |
| 5% Fe-NiS <sub>2</sub> | 4.97 | 5.00    | 4.98 |

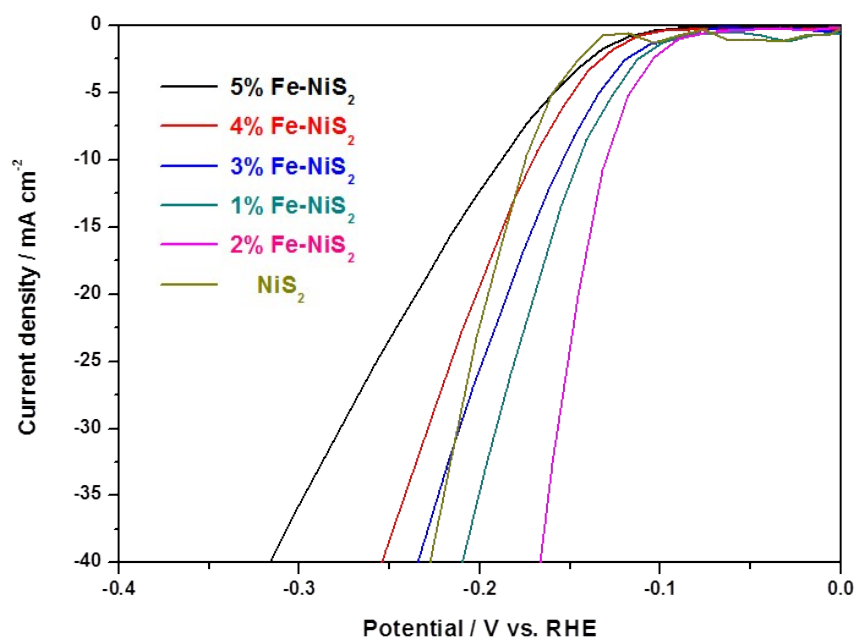

**Figure S9.** The polarization curves of the Fe-NiS<sub>2</sub> samples with the different Fe doping. 0.5 M H<sub>2</sub>SO<sub>4</sub> was used as the electrolyte, the scan rate was 2mv/s.

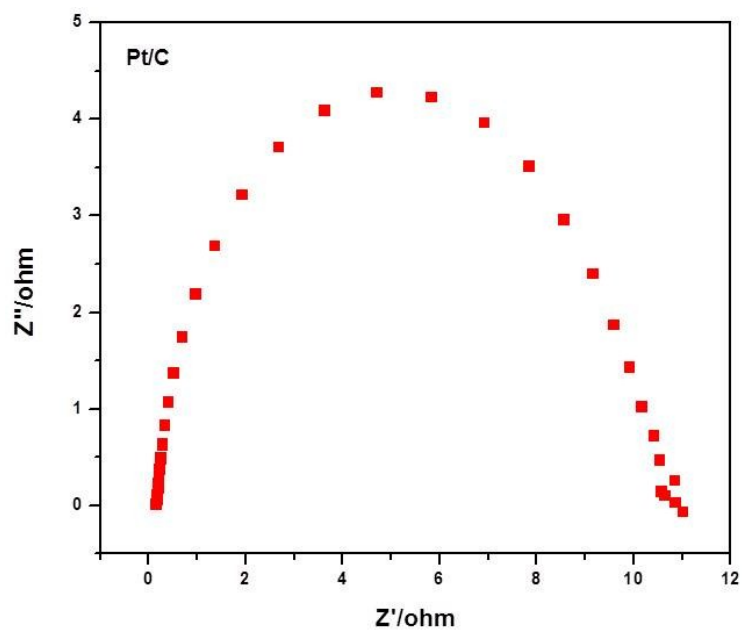

**Figure S10.** The electrochemical impedance spectra (EIS) of reference Pt/C electrode.



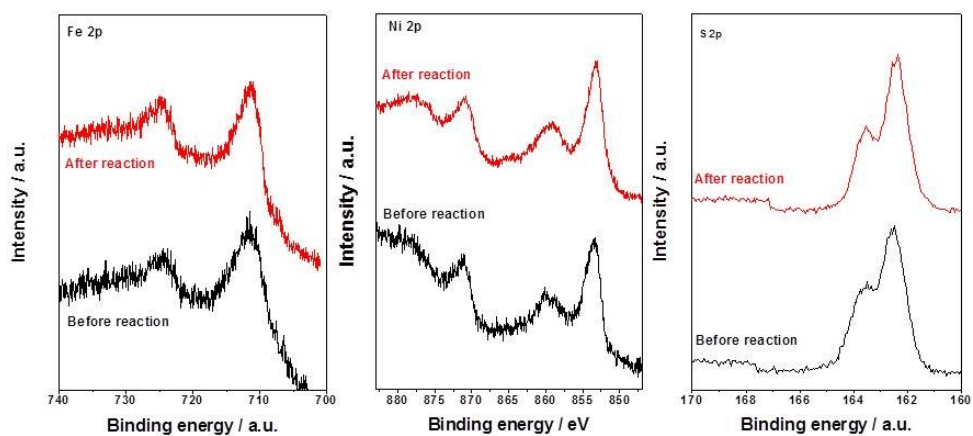

**Figure S11.** XPS curves of Fe 2p, Ni 2p and S 2p of the Fe-NiS<sub>2</sub> before and after reaction.

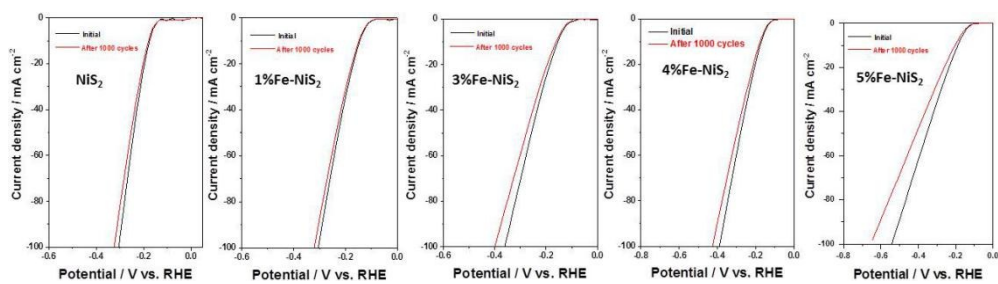

**Figure S12.** The stability performance of NiS<sub>2</sub> and other Fe doped NiS<sub>2</sub> samples.

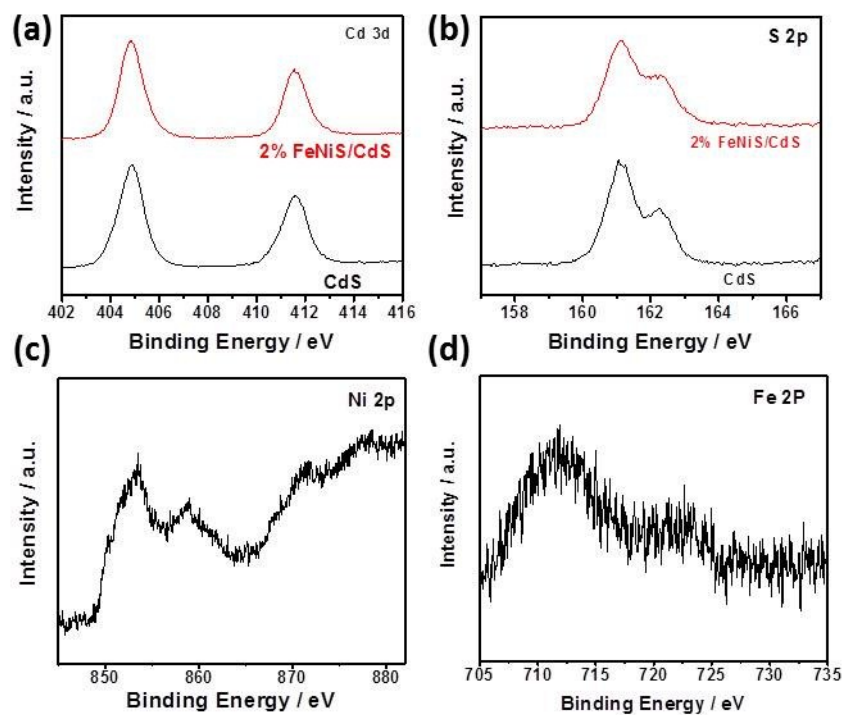

**Figure S13.** XPS curves of (a) Cd 3d, (b) S 2p, (c) Ni 2p and (d) Fe 2p of the FeNiS/CdS and bare CdS under study.

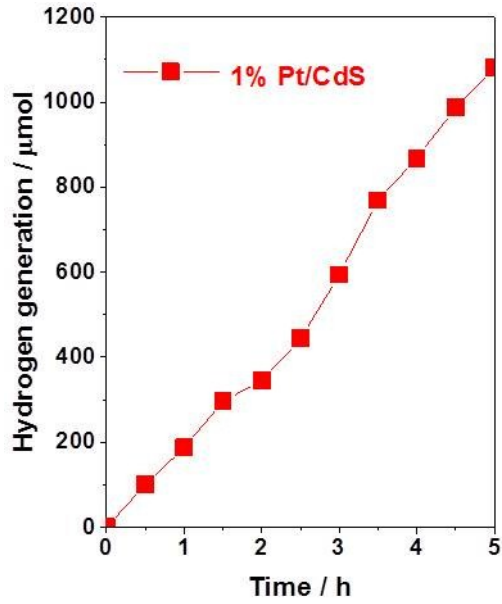

**Figure S14.** Photocatalytic  $\text{H}_2$  evolution of the 1% Pt/CdS catalyst, impregnation method was carried out for the Pt loading and then through hydrogen reduction process for the Pt/CdS formation.

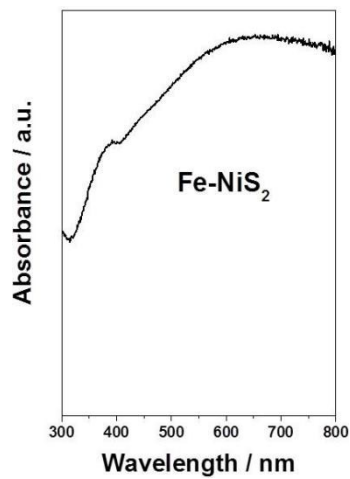

**Figure S15.** UV-Vis diffuse reflectance spectra of  $\text{Fe-NiS}_2$  under study.

## Reference

- [1] J. P. Perdew, K. Burke and M. Ernzerhof, Phys. Rev. Lett., 1996, 77, 3865.
- [2] S. Grimme, J. Comput. Chem., 2006, 27, 1787.
- [3] H. J. Monkhorst and J. D. Pack, Phys. Rev. B: Solid State, 1976, 13, 5188.
- [4] T. A. Halgren and W. N. Lipscomb, Chem. Phys. Lett., 1977, 49, 225.
